# Supplementary material for: Long noncoding RNA Regulating ImMune Escape regulates mixed lineage leukaemia protein‐1‐H3K4me3‐mediated immune escape in oesophageal squamous cell carcinoma
Source: Clin Transl Med. 2023 Sep 15;13(9):e1410. doi: 10.1002/ctm2.1410 (PMC10502462; doi:10.1002/ctm2.1410)
Supplement: Supplementary file 1 — Supporting Information [file CTM2-13-e1410-s002.pdf]

**Figure S1**

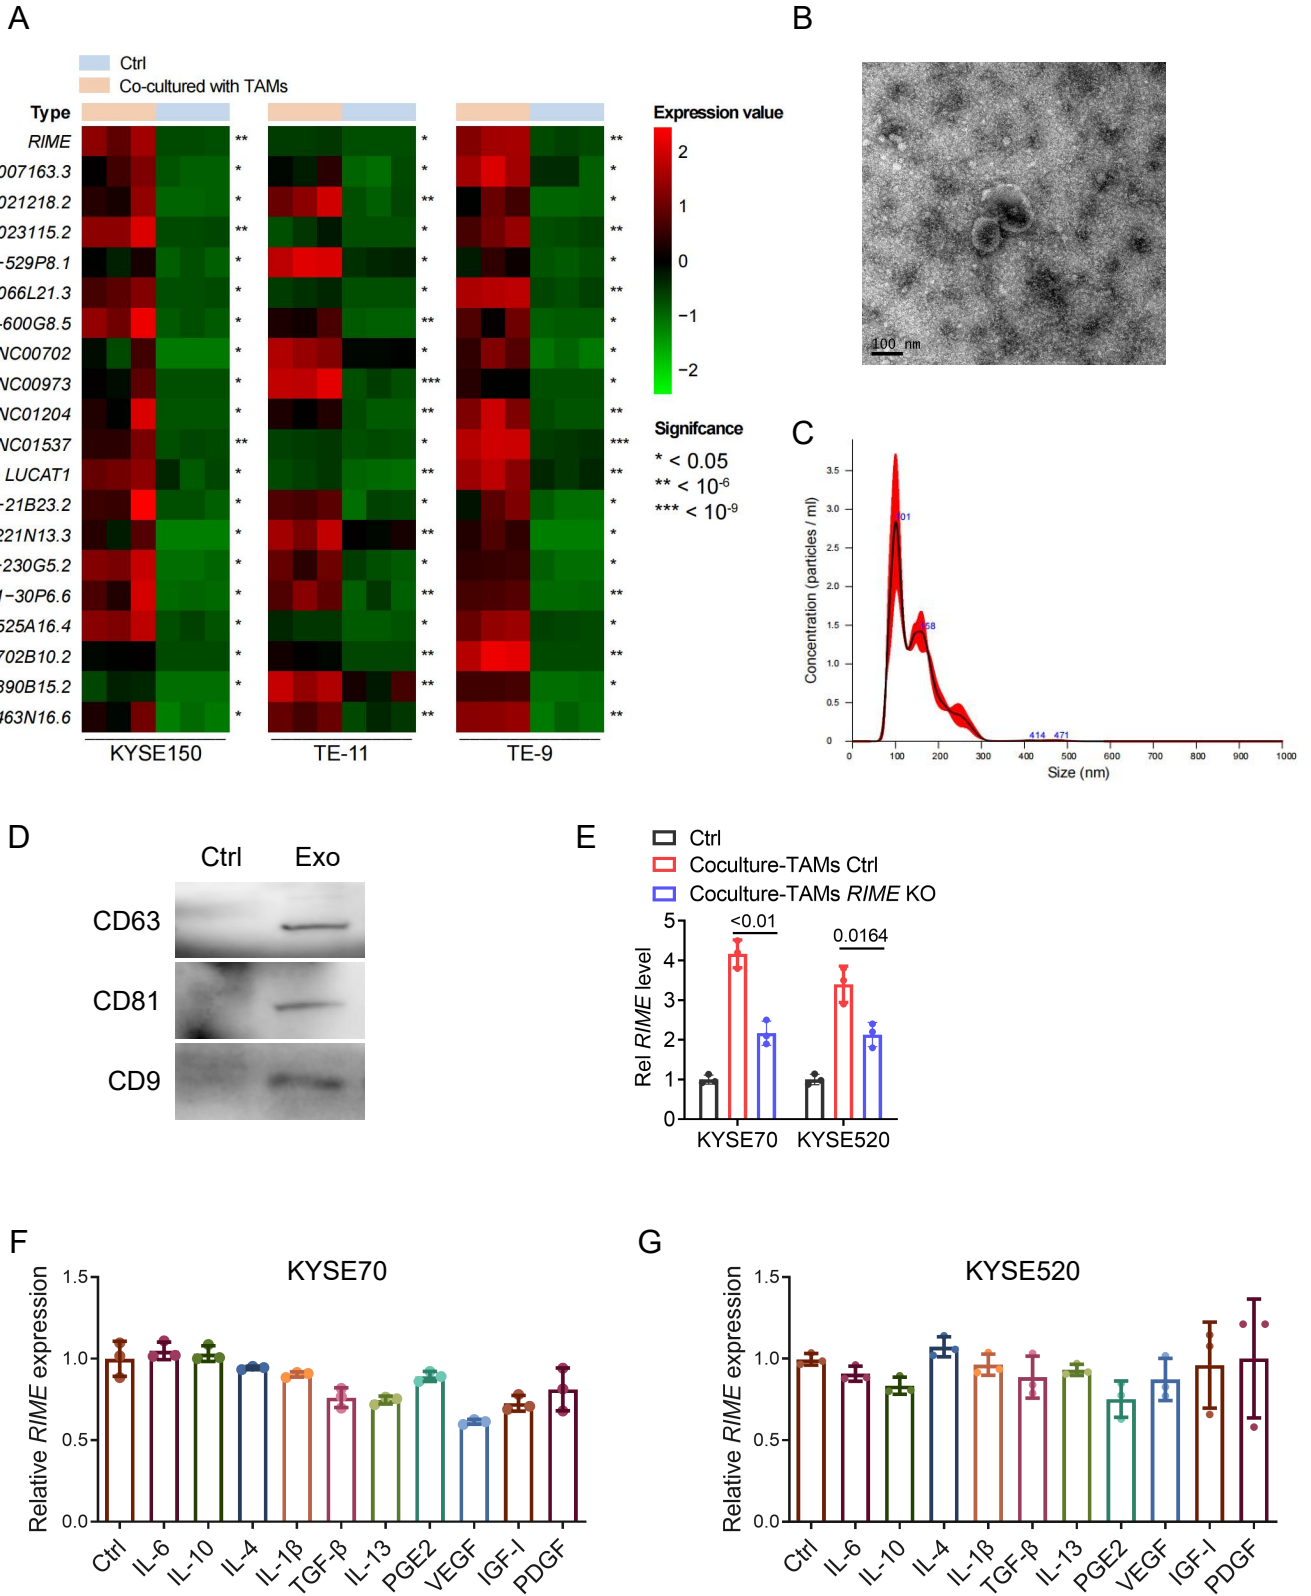

### **Figure S1 LncRNA *RIME* correlates with immunotherapy outcomes**

**(A)** TAM-associated lncRNAs were identified by performing RNA-seq analysis of ESCC cells cocultured with TAMs. **(B)** Electron microscope observation of exosomes isolated from plasma. Scale bar, 100 nm. **(C)** Nanoparticle tracking analysis of exosomes isolated from plasma. **(D)** Immunoblotting analysis of CD63, CD81, and CD9 expression in control (Ctrl, no exosome fraction) and plasma exosome fraction (Exo). Panel **B-D** demonstrated that exosomes were identified as extracellular vesicles in the approximate size of 100 nm in diameter, and contained typical exosomal markers such as CD63, CD81, and CD9. **(E)** The qRT-PCR analysis showed that *RIME* expression was upregulated in ESCC cells cocultured with TAMs, while this effect was attenuated when cocultured with *RIME* KO TAMs. **(F-G)** qRT-PCR analysis of *RIME* expression in KYSE70 and KYSE520 cells treated with various cytokines routinely secreted by TAMs, which showed that TNF- $\alpha$  stimulation upregulated *RIME* expression in ESCC cells.

Figure S2

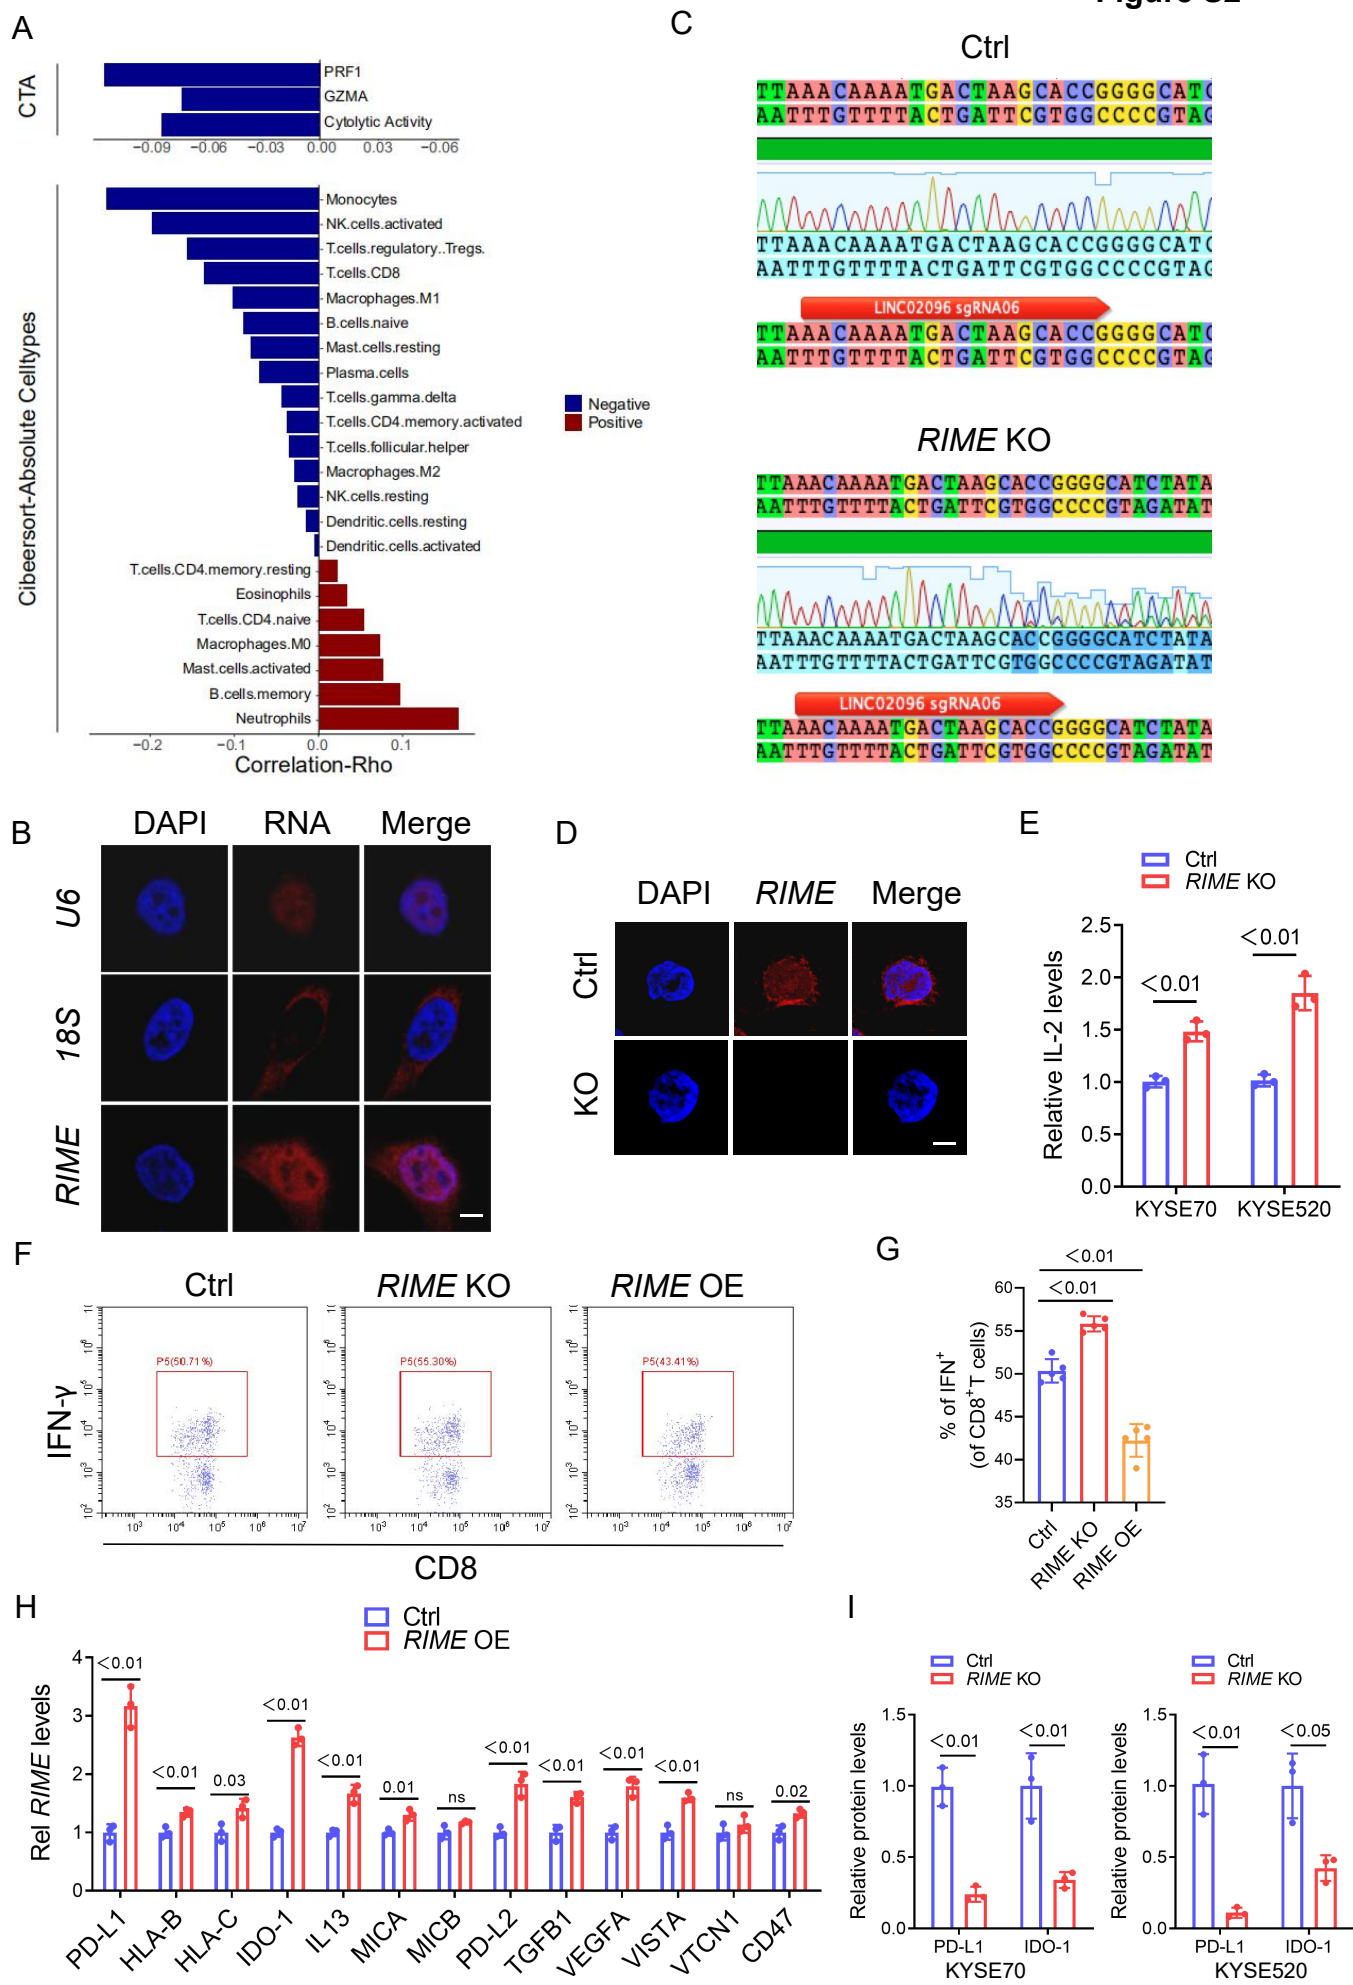

## **Figure S2 *RIME* reduces sensitivity to the cytotoxicity of CD8<sup>+</sup> T cells by regulating immune checkpoint molecules**

**(A)** The correlation of *RIME* expression level and tumour-infiltrating immune cells and tumour-killing activity was analysed based on The Cancer Genome Atlas (TCGA) transcriptome data and the CIBERSORT algorithm. The expression level of *RIME* was negatively correlated with tumour-infiltrating immune cells and tumour-killing activity. **(B)** Fluorescence in situ hybridization was performed to examine the subcellular localization of *RIME*. As shown, *RIME* was localized both in the nucleus and cytoplasm. Scale bar, 2  $\mu$ m. **(C)** Sanger sequencing showed that *RIME* KO produced obvious overlapping peaks in the gene region near the *RIME* sgRNA, indicating that *RIME* KO sgRNA had strong cleavage activity on the target gene. Ctrl, control. **(D)** Fluorescence in situ hybridization showed that *RIME* KO efficiently inhibited *RIME* expression in ESCC cells. Scale bar, 2  $\mu$ m. **(E)** ELISA assays showed that the IL-2 levels in the coculture medium were significantly increased in the *RIME* KO group. **(F-G)** Flow cytometry and statistical analysis showed that *RIME* KO significantly increased IFN- $\gamma$ <sup>+</sup> CD8<sup>+</sup> T cells cocultured with ESCC cells. **(H)** qPCR analysis showed that *RIME* OE upregulated multiple immunosuppressive genes, among which *PD-L1* and *IDO-1* was the most significant. **(I)** Quantitative analysis of immunoblot assays showed that *RIME* KO decreased PD-L1 and IDO-1 expression levels.

**Figure S3**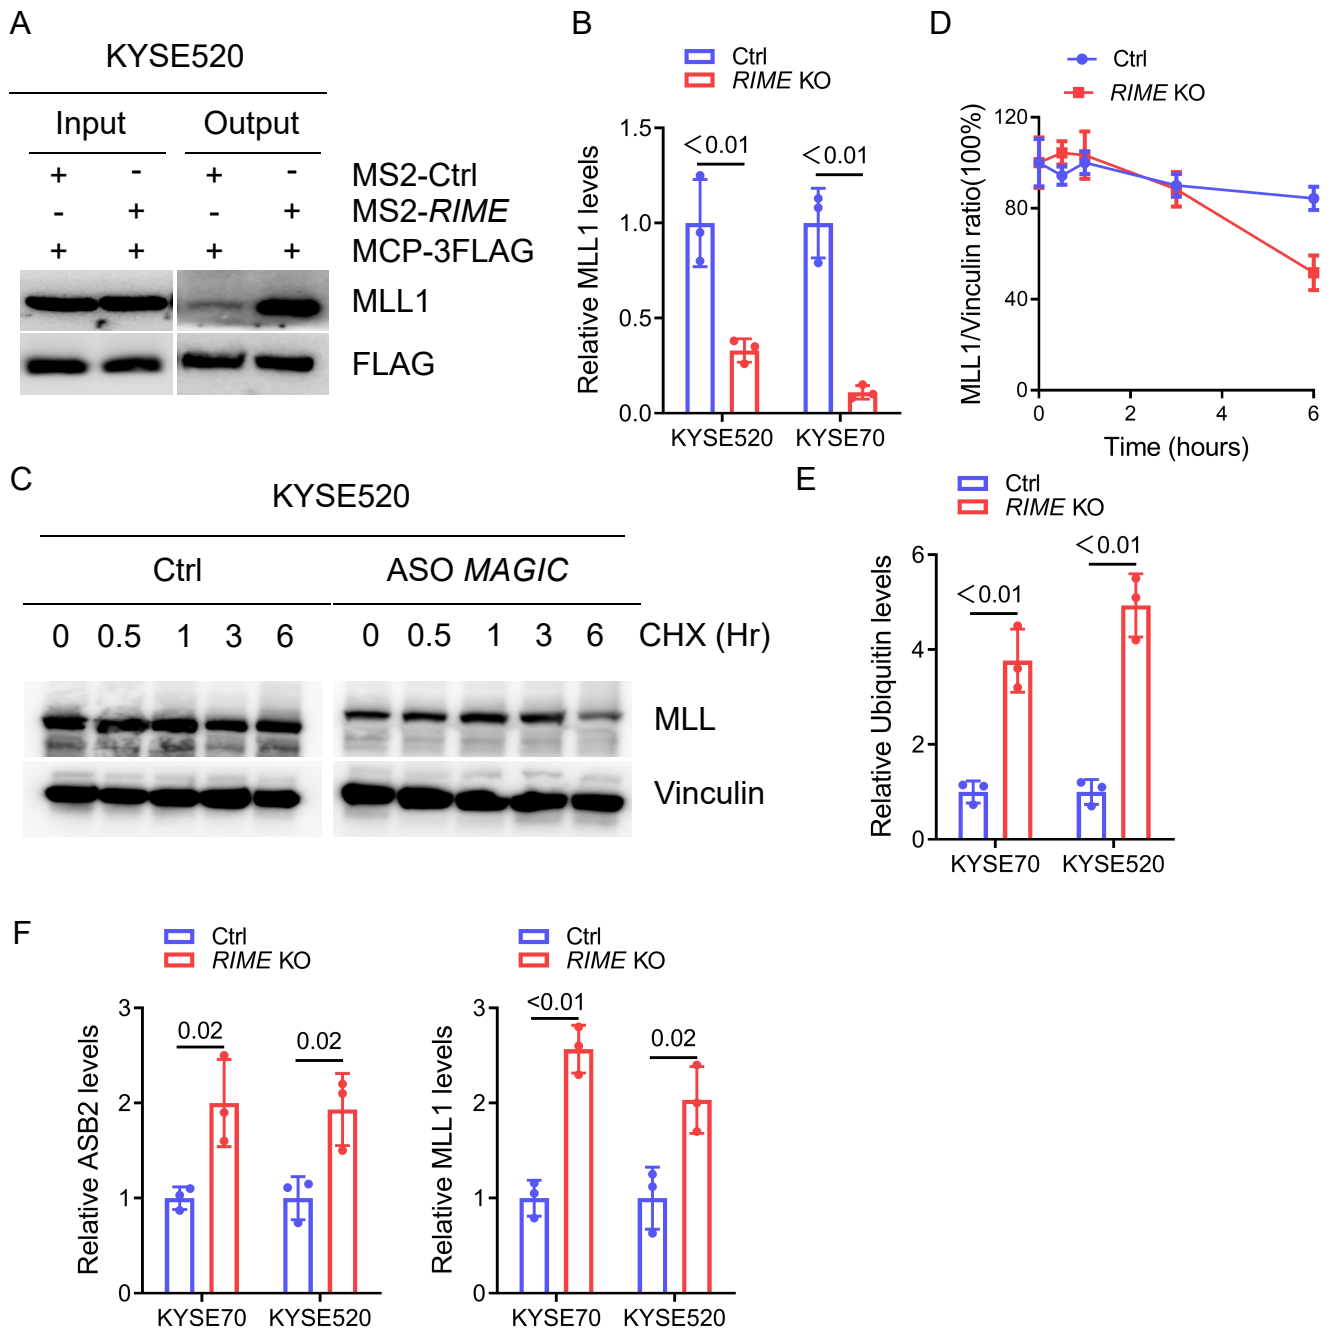**Figure S3 *RIME* binds and stabilizes MLL1**

**(A)** The interaction of *RIME* and MLL1 *in vivo* was verified by MS2-tagged RNA affinity purification assays and immunoblot analysis in KYSE520 cells. **(B)** Quantitative analysis of immunoblot assays showed that *RIME* KO decreased MLL1 expression levels. **(C-D)** Immunoblot analysis and quantification of MLL1 protein levels in KYSE520 cells treated with CHX (100 µg/ml) for the indicated times. As shown, *RIME* KO significantly shortened the half-life of MLL1 in ESCC cells. **(E)** Quantitative analysis of immunoblot assays showed that *RIME* KO increased MLL1 ubiquitin levels. **(F)** Quantitative analysis of co-IP assays showed that *RIME* KO increased MLL1/ASB2 interaction.

Figure S4

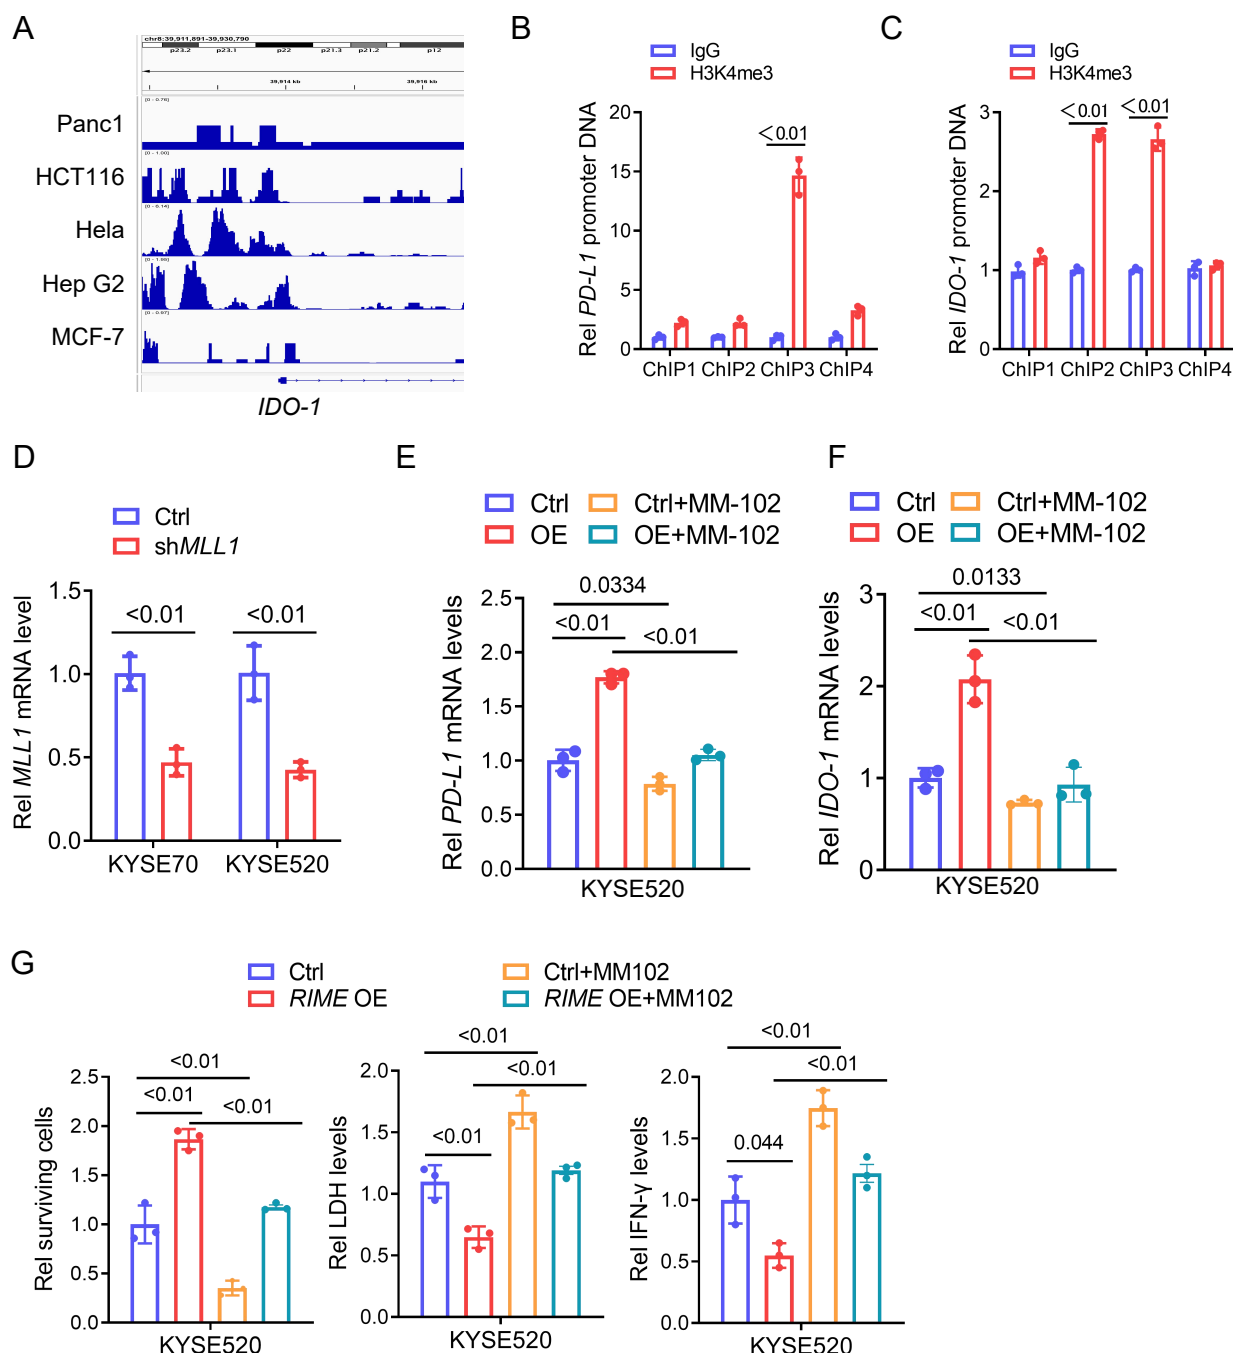

**Figure S4 *RIME* regulates MLL1-H3K4me3-mediated PD-L1/IDO-1 expression**

**(A)** ChIP-seq analysis showed that H3K4me3 levels were enriched in the *IDO-1* promoter regions. The ChIP-seq data was obtained from ENCODE database. **(B-C)** ChIP assays indicated that H3K4me3 marks were enriched in the *PD-L1* promoter region around -1000 to 0 bp, and in the *IDO-1* promoter region around -1500 to -500 bp. **(D)** qRT-PCR analysis verified that *MLL1* depletion by shRNA efficiently decreased *MLL1* mRNA levels in ESCC cells. **(E-F)** qRT-PCR analysis showed that the increased *PD-L1* and *IDO-1* expression levels induced by *RIME* overexpression were abolished by MLL1 inhibition (MM-102 treatment). **(G)** Crystal violet staining assay showed that MLL1 inhibition abolished the resistance of ESCC cells to cytotoxic CD8<sup>+</sup> T cells induced by *RIME* overexpression. The decreased LDH and IFN- $\gamma$  levels induced by *RIME* overexpression in the ESCC-T cell co-culture medium were also abolished by MLL1 inhibition.

**Figure S5**

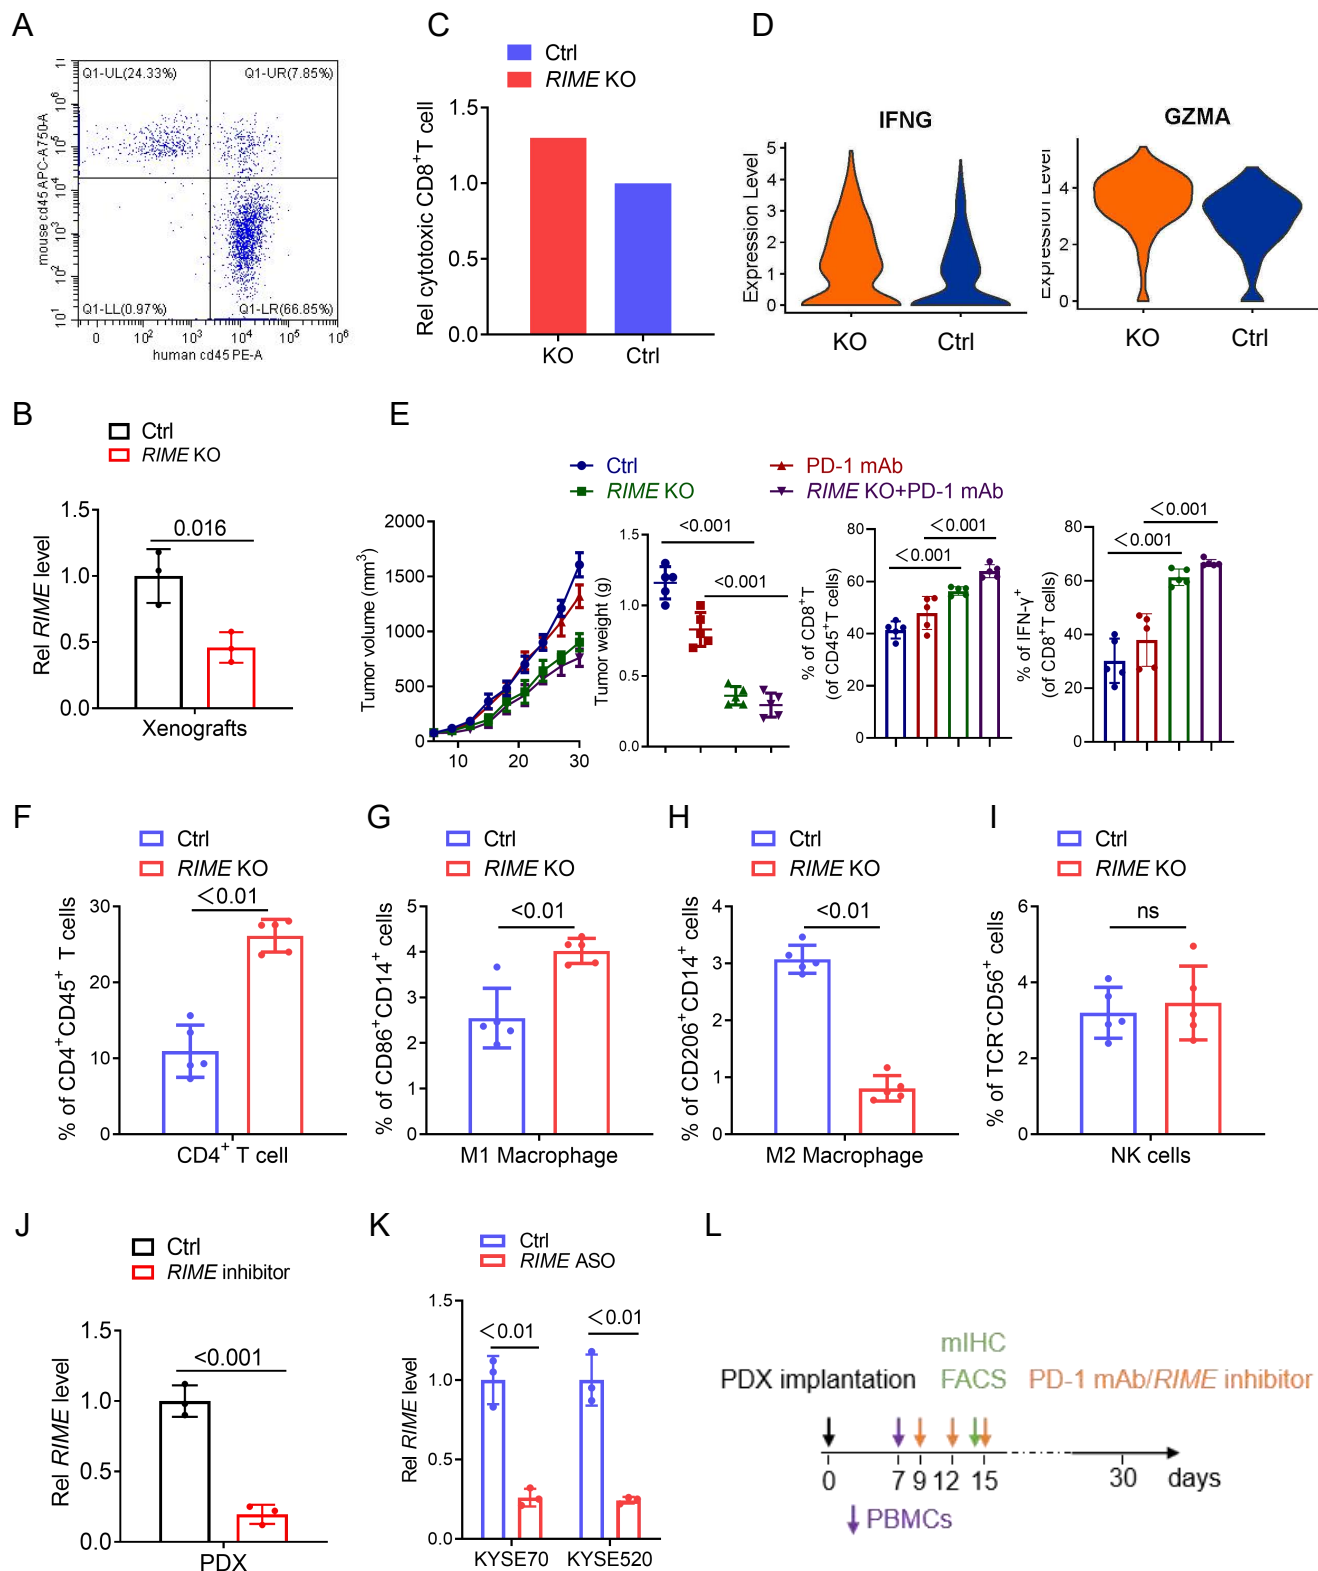

### **Figure S5 *RIME* KO enhanced antitumour immunity in ESCC treatment**

**(A)** Flow cytometry analysis of human-CD45<sup>+</sup> cells in hu-PBMC mouse peripheral blood. The proportion of human CD45<sup>+</sup> cells was more than 60%, implying that the huPBMC-NOG-CDX/PDX model was constructed successfully. **(B)** qRT-PCR analysis showed that *RIME* KO significantly suppressed *RIME* expression in ESCC xenografts. **(C)** ScRNA-seq analysis showed that *RIME* KO increased the number of cytotoxic CD8<sup>+</sup> T cells in the xenografts. **(D)** ScRNA-seq analysis showed that *RIME* KO upregulated the marker of cytotoxic CD8<sup>+</sup> T cells in the xenografts. Differentially expressed genes were identified using FindMarkers. **(E)** Flow cytometry analysis showed that *RIME* KO increased the proportion of CD8<sup>+</sup> T cells and IFN- $\gamma$ <sup>+</sup> CD8<sup>+</sup> T cells in ESCC KYSE70 xenografts. **(F)** Flow cytometry analysis showed that *RIME* KO increased the proportion of CD4<sup>+</sup> T cells in ESCC xenografts. **(G)** Flow cytometry analysis showed that *RIME* KO increased the proportion of M1 macrophages in ESCC xenografts. **(H)** Flow cytometry analysis showed that *RIME* KO decreased the proportion of M2 macrophages in ESCC xenografts. **(I)** Flow cytometry analysis showed that *RIME* KO had no effect on the proportion of NK cells in ESCC xenografts. **(J)** qRT-PCR analysis showed that *RIME* inhibitor significantly decreased *RIME* level in tumour samples collected from Hu-PBMC-NOG-PDX mice. **(K)** qRT-PCR analysis showed that *RIME* ASO efficiently decreased *RIME* levels in ESCC cells. **(L)** Time points of administration and sampling in the Hu-PBMC-NOG-PDX mice.
